# Supplementary material for: Highly efficient charge-carrier generation and collection in polymer/polymer blend solar cells with a power conversion efficiency of 5.7%
Source: Royal Society of Chemistry journal article supplement (doi:10.1039/c4ee01326c), 2014-06-27
Supplement: c4ee01326c1.pdf [file c4ee01326c1.pdf]

Electronic Supplementary Information For:

**Highly Efficient Charge-Carrier Generation and Collection  
in Polymer/Polymer Blend Solar Cells  
with a Power Conversion Efficiency of 5.7%**

**Daisuke Mori,<sup>a</sup> Hiroaki Benten,<sup>a</sup> Izumi Okada,<sup>a</sup> Hideo Ohkita,<sup>a, b</sup> and Shinzaburo Ito<sup>a</sup>**

<sup>a</sup>*Department of Polymer Chemistry, Graduate School of Engineering, Kyoto University, Katsura, Nishikyo, Kyoto 615-8510, Japan, E-mail: benten@photo.polym.kyoto-u.ac.jp*

<sup>b</sup>*Japan Science and Technology Agency (JST), PRESTO, 4-1-8 Honcho, Kawaguchi, Saitama 332-0012, Japan*

**Experimental Details**

**Materials.** The polymers PBDTTT-EF-T and N2200 were obtained from 1-Material Inc. and Polyera Corporation, respectively, and used as received. The weight-average molecular weight  $M_w$ , and polydispersity index (PDI; given by  $M_w/M_n$ , where  $M_n$  is the number-average molecular weight) of PBDTTT-EF-T as provided on the Certificate of Analysis were 115,000 g mol<sup>-1</sup> and 2.5, respectively. Those of N2200 were 178,000 g mol<sup>-1</sup> and 3.7, respectively. The  $M_w$  and PDI of N2200 were measured by size-exclusion chromatography (Shodex, GPC-101) using *o*-dichlorobenzene as the eluent, which was calibrated against monodisperse polystyrene standards (Shodex, STANDARD S-Series). The HOMO levels of the PBDTTT-EF-T and N2200 neat films were evaluated by photoelectron yield spectroscopy (Riken Keiki, AC-3). To evaluate their accurate HOMO levels, the bottom sides of their neat films were measured. Their LUMO levels were determined by adding the optical bandgap energy ( $E_g$ )

calculated from the 0-0 transition to the HOMO energy:  $E_g$  was calculated as 1.68 eV (PBDTTT-EF-T) and 1.55 eV (N2200) by using  $E_g = hc/\lambda_{0-0}$ , where  $h$  is the Planck's constant,  $c$  is the velocity of light, and  $\lambda_{0-0}$  is the wavelength of the crossing point between the absorption and PL bands of the neat films (Figure S6).

**Device Fabrication and Measurements.** ITO-coated glass substrates (10  $\Omega$  per square) were washed by ultrasonication with toluene, then acetone, and finally ethanol for 15 min each and then dried under an  $N_2$  flow. The washed substrates were further treated with a UV- $O_3$  cleaner (Nippon Laser & Electronics Lab, NL-UV253S) for 30 min. A 40-nm-thick layer of PEDOT:PSS (H. C. Stark, PH-500) was spin-coated onto the ITO substrate at a spinning rate of 3000 rpm for 99 s and then dried in air at 140  $^\circ C$  for 10 min. A blended layer of PBDTTT-EF-T/N2200 was spin-coated onto the PEDOT:PSS film at 2500 rpm for 60 s from chlorobenzene solution. The blended solution was prepared by mixing PBDTTT-EF-T and N2200 in a 1:1 weight ratio in chlorobenzene: PBDTTT-EF-T (9 mg) and N2200 (9 mg) were dissolved in 1 mL of chlorobenzene. The thickness of the PBDTTT-EF-T/N2200 blended layers was  $100 \pm 10$  nm. Preparation of the chlorobenzene solutions and subsequent spin coating of the solutions onto the PEDOT:PSS film was carried out in a  $N_2$ -filled glove box. After the spin coating, the PBDTTT-EF-T/N2200 blended films were stored in a  $N_2$ -filled glove box for one week at room temperature. Finally, a calcium interlayer (Ca, 2 nm) and an aluminum electrode (Al, 70 nm) were vacuum-deposited through a shadow mask at  $2.5 \times 10^{-4}$  Pa. The  $J-V$  characteristics of the devices were measured using a direct-current voltage and current source/monitor (Advantest, R6243) under illumination by an "air mass 1.5-Global" (AM 1.5G) simulated solar light at 100 mW  $cm^{-2}$ . The light intensity was corrected with a calibrated silicon photodiode reference cell (Bunko-Keiki, BS-520; active area: 0.0534  $cm^2$ ). The spectral-mismatch factor calculated with respect to the AM 1.5G spectrum for the PBDTTT-EF-T/N2200 test-cell and BS-520 silicon reference-cell combination was 1.02.<sup>S1</sup> The illumination intensity dependence of the  $J-V$  characteristics was performed by using

reflective neutral density (ND) filters with optical densities (OD) from 0.1 to 1.5. The EQE spectrum was measured with a digital electrometer (Advantest, R8252) under illumination of monochromatic light from a 500-W Xe lamp (Thermo Oriel, model 66921) with optical cut filters and a monochromator (Thermo Oriel, UV–visible Cornerstone). The active area of the device was 0.07 cm<sup>2</sup>, which was determined from the area of the top Ca/Al electrode. To minimize the *edge effect*, we used a device layout consisting of unpatterned PEDOT:PSS and PBDTTT-EF-T/N2200 layers sandwiched between unpatterned ITO and Ca/Al top electrodes. In this layout, the photoactive area can be assumed to be the area of the Ca/Al top electrode.<sup>S2</sup> Simulated solar light was illuminated on the ITO side of the device. All measurements were carried out under an atmosphere of N<sub>2</sub> at room temperature. The device structure is depicted in Figure S7. More than 25 devices were fabricated to ensure the reproducibility of the *J–V* characteristics.

**Mobility Measurements.** Hole-only devices were fabricated by the following procedure. A PBDTTT-EF-T neat layer and PBDTTT-EF-T/N2200 blended layer were spin-coated onto separate ITO substrates covered with 40-nm-thick PEDOT:PSS, which acted as the anode. A gold electrode (Au, 50 nm) was then vacuum-deposited on each layer as the cathode (ITO|PEDOT:PSS|PBDTTT-EF-T|Au and ITO|PEDOT:PSS|PBDTTT-EF-T/N2200|Au). Thicknesses of the PBDTTT-EF-T neat layer and PBDTTT-EF-T/N2200 blended layer were 123 nm and 82 nm, respectively. Electron-only devices were fabricated by the following procedure. A 50-nm-thick Al layer, which acted as the anode, was vacuum-deposited on a glass substrate covered with 20-nm-thick poly(sodium 4-styrenesulfonate) ( $M_w = 70,000$  g mol<sup>-1</sup>). A neat layer of N2200 and PBDTTT-EF-T/N2200 blended layer were spin-coated onto each Al electrode. A Cs<sub>2</sub>CO<sub>3</sub> interlayer (4 nm) and Al layer (80 nm) were then vacuum-deposited as the cathode (Al|N2200|Cs<sub>2</sub>CO<sub>3</sub>|Al and Al|PBDTTT-EF-T/N2200|Cs<sub>2</sub>CO<sub>3</sub>|Al). Thicknesses of the N2200 neat layer and PBDTTT-EF-T/N2200 blended layer were 145 nm and 95 nm, respectively. The Cs<sub>2</sub>CO<sub>3</sub> layer was used to enhance the efficiency of electron

injection.<sup>S3</sup> The dark  $J-V$  characteristics of the devices were measured in air (hole-only devices) and under a N<sub>2</sub> atmosphere (electron-only devices) by using a direct-current voltage and current source/monitor (Advantest, R6243). The PBDTTT-EF-T and N2200 neat layers were spin-coated from chlorobenzene solutions. The PBDTTT-EF-T/N2200 blended layer was spin-coated under the same conditions used for device fabrication.

**Photoluminescence Quenching Measurements.** PL spectra were measured for the PBDTTT-EF-T and N2200 neat films and PBDTTT-EF-T/N2200 blended film, which were spin-coated onto quartz substrates, using a calibrated fluorescence spectrophotometer (Horiba, NanoLog). The sample films were excited at 500 nm to primarily excite the PBDTTT-EF-T component and at 400 nm to mainly excite the N2200 component. The excitation fraction of each component was 78% (PBDTTT-EF-T) and 72% (N2200). The PL quenching efficiency of PBDTTT-EF-T was evaluated from the ratio of PBDTTT-EF-T PL intensity for the PBDTTT-EF-T/N2200 blended films to that for a PBDTTT-EF-T neat film (after each PL intensity was corrected for variations in PBDTTT-EF-T absorption at 500 nm). The PL quenching efficiency of N2200 was evaluated from the ratio of N2200 PL intensity for the PBDTTT-EF-T/N2200 blended films to that for an N2200 neat film (after each PL intensity was corrected for variations in N2200 absorption at 400 nm).

**Reflection Absorption Measurements.** Absorbance was measured in reflection geometry at an incident angle of 5° normal to the substrate (Hitachi, U-4100) for the PBDTTT-EF-T/N2200 blended films covered with an Al top electrode. A schematic of the film structure used in reflection absorbance measurements is depicted in the inset of Figure S2. The blended film was spin-coated from chlorobenzene solution onto a glass substrate under the same conditions used for device fabrication. The reflection absorption of the PBDTTT-EF-T/N2200 blended films was calculated from the reflection absorbance ( $Abs(\lambda)$ ) as  $(1-10^{-Abs(\lambda)}) \times 100$ .

**AFM Measurements.** Surface morphology of the PBDTTT-EF-T/N2200 blended film was observed by Atomic Force Microscopy (AFM, Simadzu, SPM-9600). Silicon probes were used with a resonant frequency of  $\sim 267$  kHz and a force constant of  $\sim 42$  N m $^{-1}$  (NANO WORLD, NCHR-10).

### 1. Device parameters

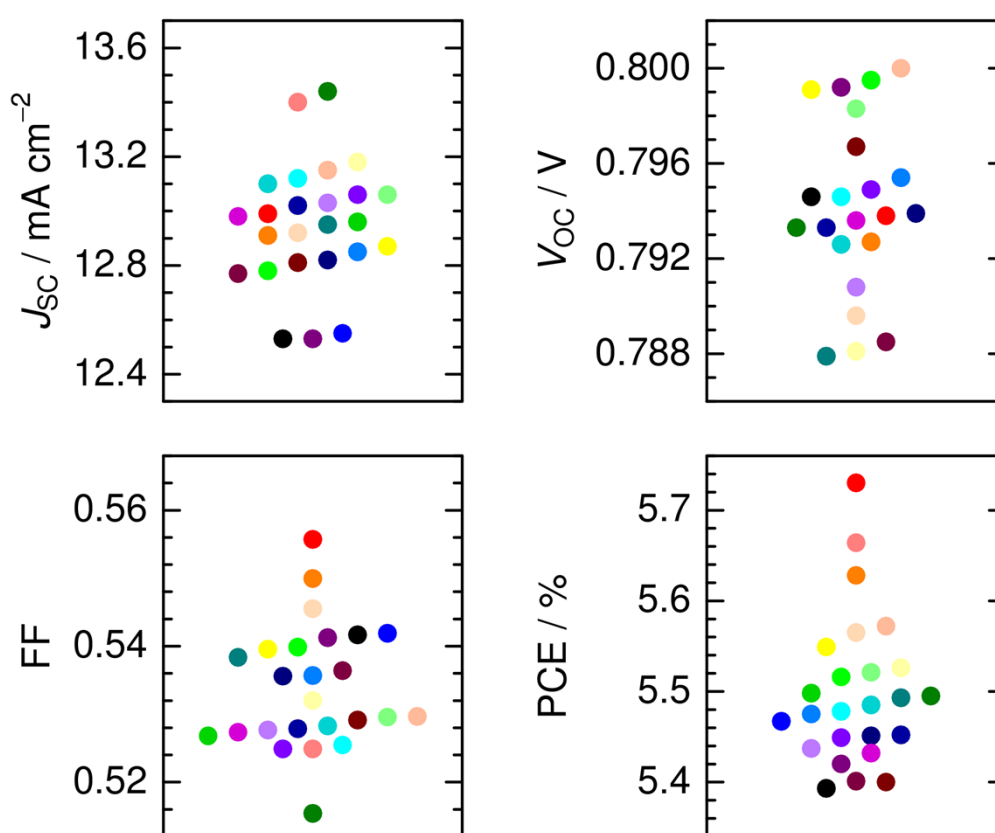

**Fig. S1** Distributions of  $J_{sc}$ , FF, PCE, and  $V_{OC}$  of PBDTTT-EF-T/N2200 BHJ solar cells. Circles of the same color in each figure represent the parameters obtained from the same device.

## 2. Calculation of the number of photons absorbed by the PBDTTT-EF-T/N2200 layer

The number of photons absorbed by the PBDTTT-EF-T/N2200 blended film ( $N_{\text{ph}}$ ) was calculated using the following equation:

$$N_{\text{ph}} = \int_{350\text{nm}}^{900\text{nm}} \frac{N_{\text{AM1.5G}}(\lambda) \cdot \%Abs(\lambda) \cdot d\lambda}{100} \quad (\text{S1})$$

In Equation S1,  $N_{\text{AM1.5G}}$  is the number of photons from AM 1.5G solar light, %Abs is the percentage absorption of the PBDTTT-EF-T/N2200 blended film, and  $\lambda$  is the wavelength. The value of %Abs was calculated from the absorbance (Abs) of the blended film as  $\%Abs(\lambda) = (1 - 10^{-\text{Abs}(\lambda)}) \times 100$ . The absorbance was measured in reflection geometry at an incident angle of  $5^\circ$  normal to the substrate (Hitachi, U-4100) for the blended film covered with an Al top electrode. Figure S2 shows the reflection absorbance of the blended film used for the calculation of %Abs. The blended film was spin-coated from chlorobenzene solution onto a glass substrate under the same conditions used for device fabrication.

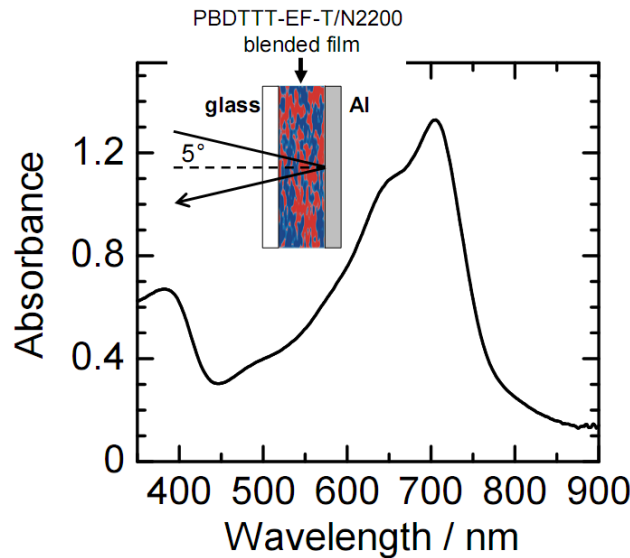

**Fig. S2** Reflection absorbance spectrum of the PBDTTT-EF-T/N2200 blended film. The inset shows a schematic of the film structure used in the reflection absorbance measurement.

### 3. Mobility measurements

Charge-carrier mobilities ( $\mu$ ) were calculated from the dark  $J$ - $V$  characteristics using the space-charge-limited current (SCLC) method using the Mott-Gurney equation for current

density  $J_{\text{SCLC}}$ , expressed as  $J_{\text{SCLC}} = \frac{9}{8} \varepsilon_0 \varepsilon_r \mu \frac{V^2}{L^3}$ , where  $\varepsilon_0$  is the vacuum permittivity,  $\varepsilon_r$  is the

dielectric constant of the film ( $\varepsilon_r = 3$  was assumed), and  $L$  is the thickness of the active

layer.<sup>S4, S5</sup> The  $J$ - $V$  characteristics of the hole-only devices and those of the electron-only

devices are shown in Figures S3-1 and S3-2, respectively.

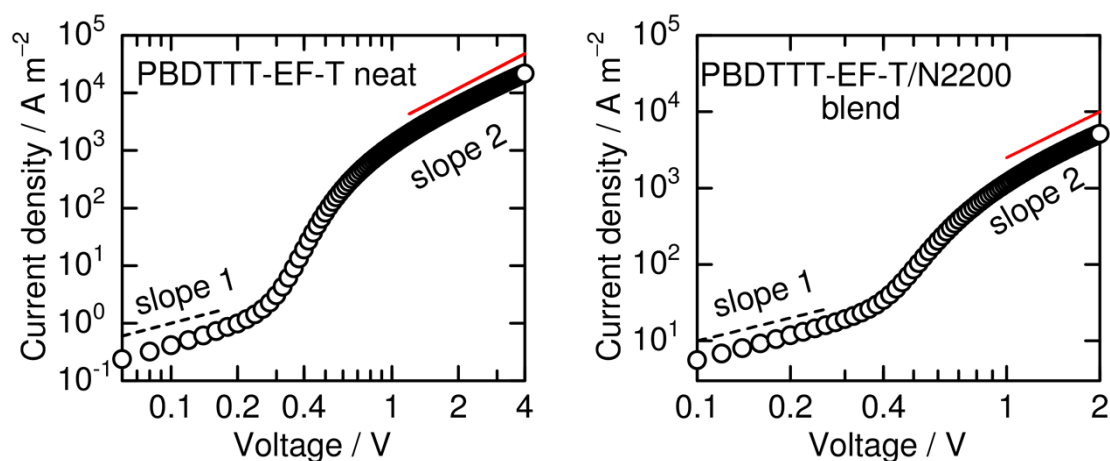

**Fig. S3-1** The dark  $J$ - $V$  characteristics of ITO|PEDOT:PSS|PBDTTT-EF-T(123 nm)|Au and ITO|PEDOT:PSS|PBDTTT-EF-T/N2200(82 nm)|Au hole-only devices.

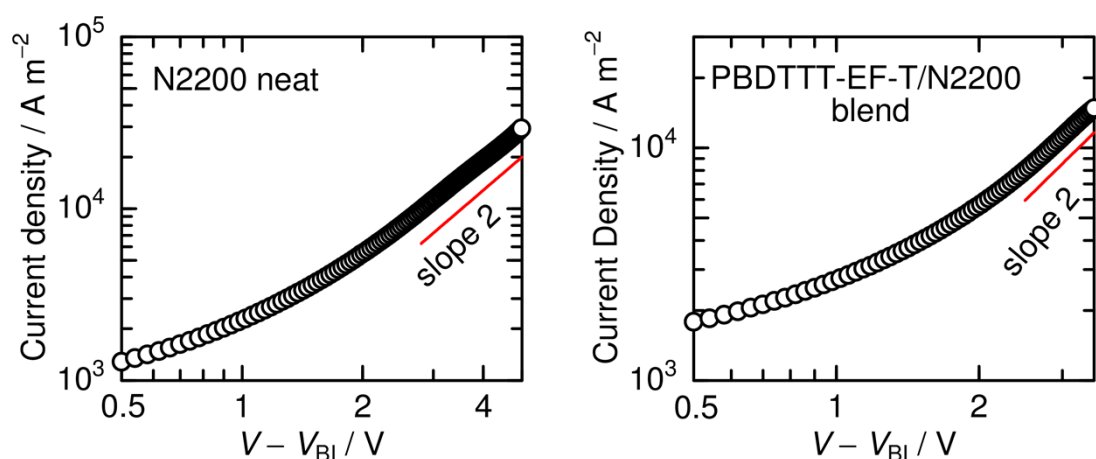

**Fig. S3-2** The dark  $J$ - $V$  characteristics of Al|N2200(145 nm)|Cs<sub>2</sub>CO<sub>3</sub>/Al and Al|PBDTTT-EF-T/N2200(95 nm)|Cs<sub>2</sub>CO<sub>3</sub>/Al electron-only devices. The applied voltage  $V$  was corrected for the built-in voltage  $V_{\text{BI}}$  of 2.1 V.<sup>S6, S7</sup>

#### 4. Dependence of charge-carrier mobilities on film thickness.

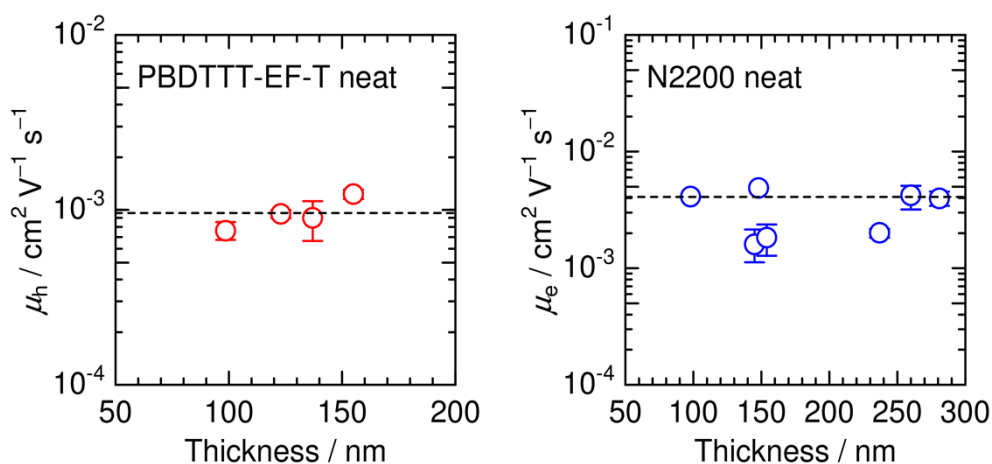

**Fig. S4** Hole ( $\mu_h$ ) and electron ( $\mu_e$ ) mobilities of PBDTTT-EF-T and N2200 neat films evaluated for different film thickness.

Charge-carrier mobilities in the PBDTTT-EF-T/N2200 blended film calculated by considering the voltage drop due to contact resistance (the resistance of our cells was assumed to be  $10 \Omega$ <sup>S8, S9</sup>) are  $\mu_h = 4.1 \times 10^{-4} \text{ cm}^2 \text{V}^{-1} \text{s}^{-1}$  and  $\mu_e = 4.8 \times 10^{-4} \text{ cm}^2 \text{V}^{-1} \text{s}^{-1}$ , respectively

#### 5. Dependence of FF on active layer thickness

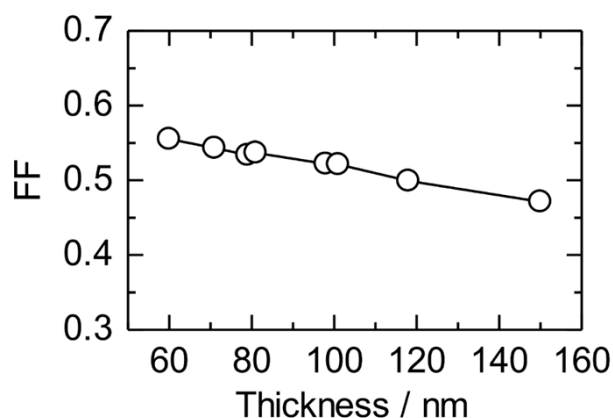

**Fig. S5** FF of PBDTTT-EF-T/N2200 BHJ solar cells with varying thicknesses ranging from 60 nm to 150 nm under AM 1.5G illumination ( $100 \text{ mW cm}^{-2}$ ).



## 6. Calculation of optical bandgap energy ( $E_g$ )

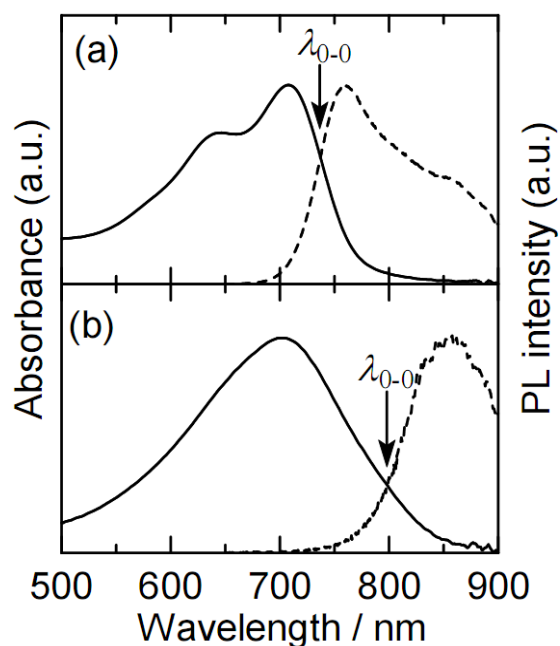

**Fig. S6** Absorbance (solid line) and PL (dashed line) spectra of (a) PBDTTT-EF-T and (b) N2200 neat films spin-coated from chlorobenzene solution. The optical bandgap energy ( $E_g$ ) was calculated from the 0-0 transition using  $E_g = hc/\lambda_{0-0}$ , where  $h$  is the Planck's constant,  $c$  is the velocity of light, and  $\lambda_{0-0}$  is the wavelength of the crossing point between the absorption and PL bands.

## 7. Device structure

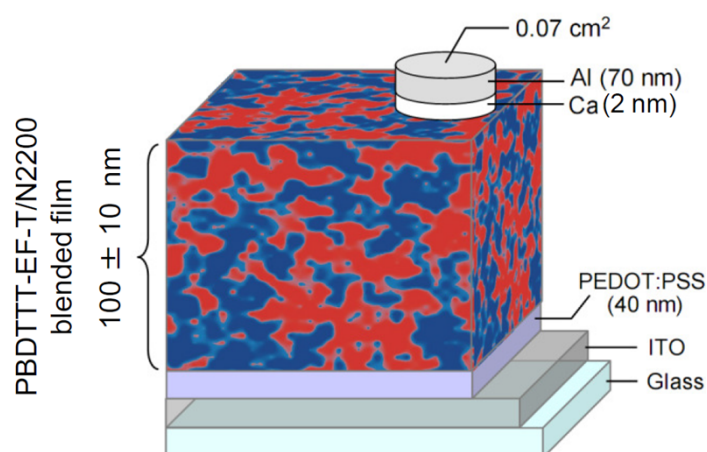

**Fig. S7** Schematic illustration of the PBDTTT-EF-T/N2200 device structure.

## References

- (S1) V. Shrotriya, G. Li, Y. Yao, T. Moriarty, K. Emery and Y. Yang, *Adv. Funct. Mater.* 2006, **16**, 2016.
- (S2) A. Cravino, P. Schilinsky and C. J. Brabec, *Adv. Funct. Mater.* 2007, **17**, 3906.
- (S3) G. J. A. H. Wetzelaer, M. Kuik, Y. Olivier, V. Lemaur, J. Cornil, S. Fabiano, M. A. Loi and P. W. M. Blom, *Phys. Rev. B* 2012, **86**, 165203.
- (S4) G. G. Malliaras, J. R. Salem, P. J. Brock and C. Scott, *Phys. Rev. B* 1998, **58**, R13411
- (S5) Y. Shen, A. R. Hosseini, M. H. Wong and G. G. Malliaras, *ChemPhysChem* 2004, **5**, 16.
- (S6) The  $V_{\text{BI}}$  was estimated from the difference in the work functions between the Al anode (4.3 eV) and  $\text{Cs}_2\text{CO}_3/\text{Al}$  cathode (2.2 eV).<sup>S7</sup>
- (S7) J. Huang, Z. Xu and Y. Yang, *Adv. Funct. Mater.* 2007, **17**, 1966.
- (S8) S. M. Tuladhar, D. Poplavskyy, S. A. Choulis, J. R. Durrant, D. D. C. Bradley and J. Nelson, *Adv. Funct. Mater.* 2005, **15**, 1171.
- (S9) Y. Liang, Z. Xu, J. Xia, S. T. Tsai, Y. Wu, G. Li, C. Ray and L. Yu, *Adv. Mater.* 2010, **22**, E135.
